# Supplementary material for: Nitroxide-mediated polymerization of pentafluorostyrene initiated by PS–DEPN through the surface of APTMS modified fumed silica: towards functional nanohybrids
Source: Royal Society of Chemistry journal article supplement (doi:10.1039/c6ra08973a), 2016-01-01
Supplement: c6ra08973a1.pdf [file c6ra08973a1.pdf]

SUPPORTING INFORMATIONS

Nitroxide-mediated polymerization of pentafluorostyrene initiated by PS-DEPN through the surface of APTMS modified fumed silica : Towards functional nanohybrids.

Quanyi Yin,<sup>ab</sup> Aurelia Charlot<sup>a</sup>, Daniel Portinha<sup>a</sup>, Emmanuel Beyou<sup>b</sup>

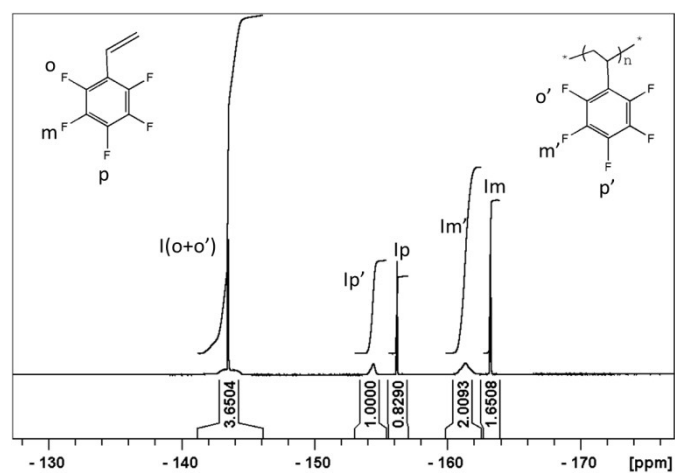

**Fig. S1**  $^{19}\text{F}$  NMR of spectrum of the reaction mixture for calculation of the conversion PFS (presented spectrum corresponds to 55% conversion in MP after 4 hours).

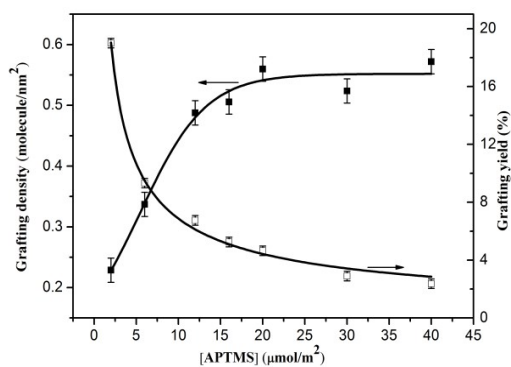

**Fig. S2** Grafting density (filled symbols) and grafting yield (hollow symbols) of APTMS as a function of the concentration of APTMS. Silica concentration 3.8 wt % in Toluene. Temperature 110 °C. Reaction time 24 h.

**Table S1** Characteristics of free PS-PPFS block copolymers synthesized in presence of APTMS-grafted silica as a function of solvent.

| Solvent | Time (h) | Conversion (%) | Mn (theo) (g/mol) | Mn (NMR) (g/mol) | Mn (SEC) (g/mol) | $\bar{D}$ |
|---------|----------|----------------|-------------------|------------------|------------------|-----------|
| MP      | 0.5      | 17             | 10700             | 10500            | 8900             | 1.29      |
|         | 1        | 31             | 16100             | 17800            | 12600            | 1.18      |
|         | 2        | 48             | 22700             | 24300            | 15100            | 1.15      |
|         | 4        | 74             | 32800             | 30900            | 18000            | 1.14      |
|         | 6        | 76             | 33600             | 31600            | 18900            | 1.15      |
| DMF     | 0.5      | 17             | 9900              | 10500            | 11000            | 1.28      |
|         | 1        | 19             | 10700             | 11100            | 12200            | 1.23      |
|         | 2        | 34             | 16300             | 18200            | 16800            | 1.17      |
|         | 4        | 47             | 21500             | 22500            | 19900            | 1.13      |
|         | 6        | 62             | 27300             | 28500            | 23000            | 1.11      |
| TOLUENE | 1        | 2.2            | 5300              | 5400             | 4600             | 1.57      |
|         | 2        | 4.3            | 6100              | 6500             | 5300             | 1.5       |
|         | 4        | 7              | 7100              | 7300             | 5800             | 1.48      |
|         | 6        | 12.2           | 9100              | 8700             | 7700             | 1.36      |

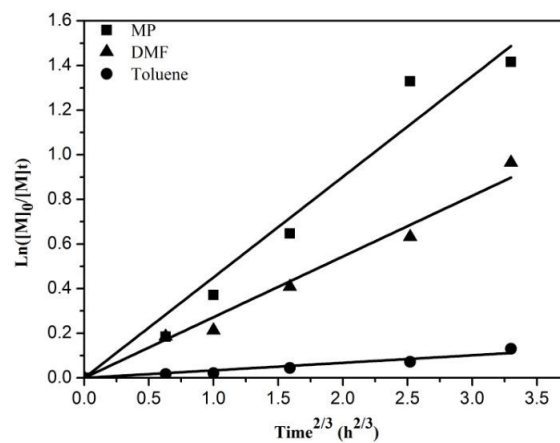

**Fig. S3** Kinetic plot for the polymerization of PFS in the presence of APTMS modified silica (4.3 wt.%).

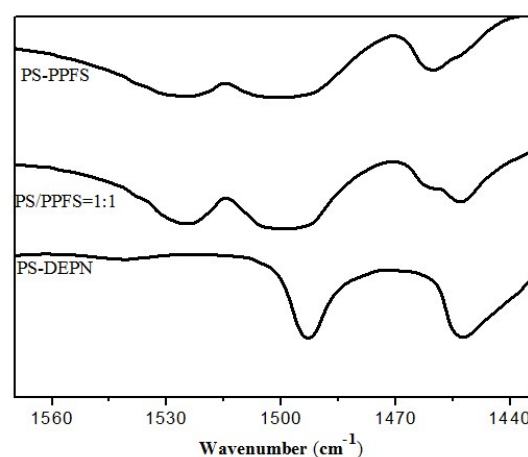

**Fig. S4** FT-IR spectra of free PS-b-PPFS copolymer, PS/PPFS homopolymers mixture (1/1, w/w) and PS-DEPN macroinitiator

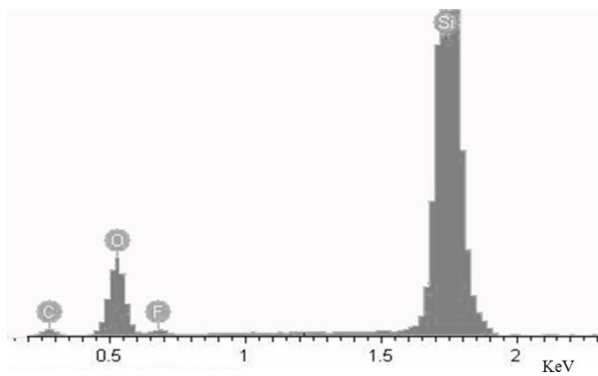

**Fig. S5** EDX analysis from TEM image for PS-b-PPFS grafted silica.

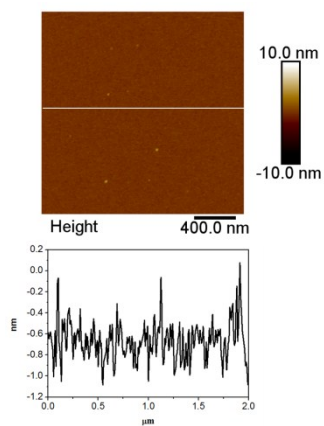

**Fig. S6** AFM topographic images of deposition resulting from neat silicon wafer.
